# Supplementary material for: “I’m not gonna be able to do anything about it, then what’s the point?”: A broad group of stakeholders identify barriers and facilitators to HCV testing in a Massachusetts jail
Source: PubMed Central journal article supplement (PMC8153419; doi:10.1371/journal.pone.0250901), 2021-05-26
Supplement: pone.0250901.s002.pdf [file pone.0250901.s002.pdf]

S1 Table. Codes for People Who Are In Jail.

| <b>Codes</b>        | <b>Subcodes</b>                |
|---------------------|--------------------------------|
| Priorities          |                                |
| Access              |                                |
| Barriers            |                                |
| Legal               | Legal action                   |
|                     | Healthcare system              |
|                     | Legal rights                   |
|                     | HIV vs HCV                     |
| Treatment           | Treatment                      |
|                     | Medications                    |
|                     | Side effects                   |
|                     | Treatment payment              |
| Status quo          | Normalization                  |
|                     | Status quo                     |
|                     | Perceived changes over time    |
|                     | Institutional inertia          |
|                     | Inevitability                  |
|                     | Jail is supposed to be bad     |
|                     | Seriousness                    |
| Deservingness       | Deservingness                  |
|                     | Risk behaviors                 |
|                     | Mistrust                       |
|                     | Concern for transmission       |
|                     | Stigma                         |
|                     | Reinfection                    |
|                     | Mandate to treat               |
|                     | Frustration                    |
| Transience          | Transient population           |
| Systems perspective | Differential care              |
|                     | Fragmented healthcare          |
|                     | Facilitators                   |
|                     | Captive audience               |
|                     | Linkage to care                |
| Knowledge:          | Knowledge                      |
|                     | Word of mouth                  |
|                     | Patient provider communication |
|                     | Reliable information           |
|                     | Conflicting beliefs            |
|                     | Uncertainty about future       |

|         |                               |
|---------|-------------------------------|
|         | HCV status                    |
|         | Personal experience           |
|         | Positive personal experience  |
|         | Negative personal experience  |
|         | Social network                |
|         | Personal health               |
|         | Does not know people with hcv |
|         | Self-efficacy                 |
|         | Knows people with hcv         |
|         | Control                       |
| Testing | Testing                       |
|         | “”Frequency                   |
|         | “”payment                     |
|         | “”Testing                     |
|         | “”preference                  |
|         | “”location                    |
