# Supplementary material for: “I’m not gonna be able to do anything about it, then what’s the point?”: A broad group of stakeholders identify barriers and facilitators to HCV testing in a Massachusetts jail
Source: PubMed Central journal article supplement (PMC8153419; doi:10.1371/journal.pone.0250901), 2021-05-26
Supplement: pone.0250901.s003.pdf [file pone.0250901.s003.pdf]

S2 Table. Codes for Non-Incarcerated Stakeholders

| <b>Code</b>                                                | <b>Sub-Code</b>                           |
|------------------------------------------------------------|-------------------------------------------|
| Barriers                                                   |                                           |
| Access                                                     |                                           |
| Testing                                                    |                                           |
| Treatment                                                  |                                           |
| Facilitators                                               |                                           |
| Cost-related                                               | Limited resources                         |
|                                                            | Fiscal barriers                           |
|                                                            | Trade-off between cost and outcome        |
|                                                            | Funding                                   |
|                                                            | Priorities (what does the speaker think?) |
|                                                            | Priorities (what does the system value)   |
|                                                            | Side-effects                              |
| Deservingness                                              | Deservingness                             |
|                                                            | Obligation                                |
|                                                            | Mandate to treat                          |
|                                                            | Jail is supposed to be bad                |
|                                                            | Moral responsibility                      |
|                                                            | Mistrust                                  |
|                                                            | Stigma                                    |
|                                                            | Seriousness                               |
|                                                            | Frustration                               |
|                                                            | Risk behaviors                            |
|                                                            | Substance use disorder treatment          |
|                                                            | Reinfection                               |
| Transience                                                 | Differences between jails/prisons         |
| (issues with transient population from system perspective) | Silo-ed healthcare                        |
|                                                            | Heterogeneity between jails               |
|                                                            | Outsourced/privatized healthcare          |
|                                                            | Differential care                         |
|                                                            | Fragmented healthcare                     |
|                                                            | HIV vs HCV                                |
|                                                            | Healthcare systems                        |
|                                                            | Building on current systems               |
|                                                            | Standard of care                          |
|                                                            | Sentence period                           |
|                                                            | Complexity of the system                  |
|                                                            | Transient population                      |
|                                                            | Captive audience                          |
|                                                            | Current process                           |
|                                                            | Uncertainty about future                  |
| Public Health                                              | Transmission                              |
|                                                            | Outbreak                                  |
|                                                            | Harm reduction                            |
|                                                            | Public health                             |

|                                     |                                    |
|-------------------------------------|------------------------------------|
|                                     | HCV prevalence                     |
|                                     | Need for data                      |
|                                     | Shared responsibility              |
|                                     | Personal responsibility            |
|                                     | Interdisciplinary collaboration    |
|                                     | Linkage to care                    |
|                                     | Unclear roles and responsibilities |
| Legal/political                     | Historical changes                 |
| How does policy influence HCV care? | Change in legal landscape          |
|                                     | Legal action                       |
|                                     | Policy                             |
|                                     | Suggestions for improvement        |
|                                     | What is working well               |
|                                     | Political process                  |
|                                     | Legal rights                       |
| Communication                       | Communication                      |
|                                     | Comfort when discussing hcv        |
|                                     | Knowledge                          |
|                                     | Word of mouth                      |
|                                     | Patient provider communication     |
|                                     | Conflicting beliefs                |
|                                     | Experience                         |
|                                     | Educational resources              |
|                                     | Guidelines                         |
| Choices                             | Control                            |
|                                     | Normalization                      |
|                                     | Inevitability                      |
|                                     | Patient autonomy                   |
|                                     | Clinician autonomy                 |
|                                     | Status quo                         |
|                                     | Decision makers                    |
